# Supplementary figures and images for: A multitiered analysis platform for genome sequencing: Design and initial findings of the Australian Genomics Cardiovascular Disorders Flagship
Source: PubMed Central journal article supplement — Genet Med Open. 2024 Mar 25;2:101842. doi: 10.1016/j.gimo.2024.101842 (PMC11613726; doi:10.1016/j.gimo.2024.101842), 2024-03-25

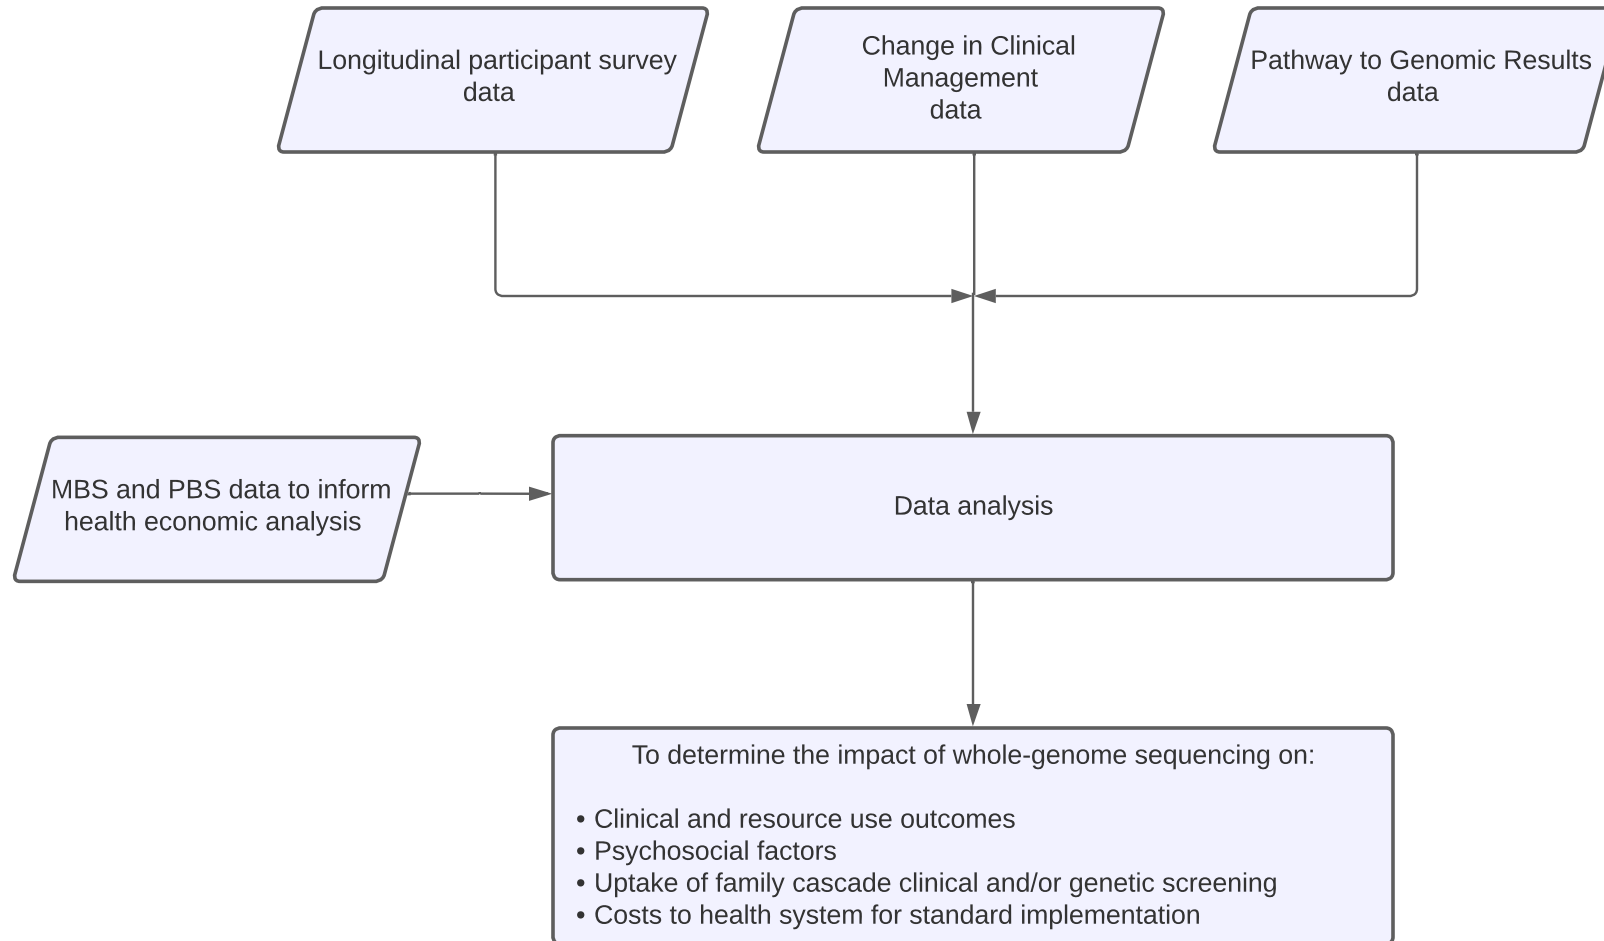

Supplement: mmc1.pdf [file mmc1.pdf]
